# Supplementary material
Source: publisher figshare collection journal article supplement (https://sage.figshare.com/ndownloader/files/21945585)
Supplement: Supplementary file 1 [file 21945585]

## Democratic values, education, and political trust

On-line supplemental materials

### Appendix A: Question wording

Source: Wave 4 1999-2002 World Values Survey Questionnaire (WVS 2014).

#### Democratic values

*I'm going to describe various types of political systems and ask what you think about each as a way of governing this country. For each one, would you say it is a very good, fairly good, fairly bad or very bad way of governing this country?*

*Having a strong leader who does not have to bother with parliament and elections;  
Having the army rule;  
Having a democratic political system.*

Response options: “very good, “ “good, “ “bad, “very bad. “  
They were recoded into “very good“ = 3, “good“ = 2, “bad“ = 1, “very bad“ = 0.

*Democracy may have problems but it's better than any other form of government.*

Response options: “agree strongly”, “agree”, “disagree”, “strongly disagree”.

For constructing the index, they were recoded to: “agree strongly“ = 3, “agree“ = 2, “disagree“ = 1, “strongly disagree“ = 0.

#### Trust in parliament

*I am going to name a number of organizations. For each one, could you tell me how much confidence you have in them: is it a great deal of confidence, quite a lot of confidence, not very much confidence or none at all?*

Response options: “A great deal”, “Quite a lot”, “Not very much”, “None at all”.

#### Education

*At what age did you (or will you) complete your full time education, either at school or at an institution of higher education? Please exclude apprenticeships.*

#### Income

*Here is a scale of incomes. We would like to know in what group your household is, counting all wages, salaries, pensions and other incomes that come in. Just give the letter of the group your household falls into, before taxes and other deductions.*

Response options: 1 2 3 4 5 6 7 8 9 10  
C D E F G H I J K L

Note: For more information about differences in the measurement of household income across surveys in the World Values Survey see: Donnelly and Pop-Eleches (2018).

## Appendix B: Democratic values invariance test

Items:

Having a democratic political system,  
Democracy may have problems but it's better than any other form of government,  
Having a strong leader,  
Having the army rule.

*N* surveys: 107.

*N* individuals: 98,444.

Multi-Group Factor Analysis Alignment with the `sirt` package (Robitzsch, 2019)

Alignment Power Values = 0.25 0.25

Alignment Scale Values = 1 1

Epsilon Value = 0.001

Alignment Results Lambda Parameters

Parameter tolerance value = 1

Total number of items = 428

Number of unique item parameters = 5

Percentage of non-invariant item parameters = 0.2%

Unique item parameters per item

Having a democratic political system: 0

Democracy may have problems but it's better than any other form of government: 1

Having a strong leader: 0

Having the army rule: 0

Joint item parameters

Having a democratic political system: 0.524

Democracy may have problems but it's better than any other form of government: 0.475

Having a strong leader: -.404

Having the army rule: -0.295

Item parameters in the sample from Morocco:

Having a democratic political system: 0.524

Democracy may have problems but it's better than any other form of government: -0.548

Having a strong leader: -.404

Having the army rule: -0.295

## Appendix C: Political trust invariance test

Items: trust in parliament, trust in justice system, trust in political parties.

$N$  countries: 43.

$N$  individuals: 39,943.

Multi-Group Factor Analysis Alignment with the `sirt` package (Robitzsch, 2019)

Alignment Power Values = 0.25 0.25

Alignment Scale Values = 1 1

Epsilon Value = 0.001

Parameter tolerance value = 1

Total number of items = 129

Number of unique item parameters = 3

Percentage of non-invariant item parameters = 0%

Unique item parameters per item

Trust in political parties: 0

Trust in justice system: 0

Trust in parliament: 0

Joint item parameters

Trust in political parties: 0.487

Trust in justice system: 0.382

Trust in parliament: 0.660

## Appendix D: Supplemental models: Excluding the survey from Morocco

Table D1. Descriptive statistics.

| Variable name                           | Mean   | Standard deviation | Minimum | Maximum |
|-----------------------------------------|--------|--------------------|---------|---------|
| Individual-level variables (N = 99,253) |        |                    |         |         |
| Trust in parliament                     | 1.274  | 0.898              | 0       | 3       |
| Democratic values                       | 2.848  | 2.242              | -6      | 6       |
| Education, years                        | 10.805 | 3.972              | 0       | 20      |
| Household income                        | 4.733  | 2.509              | 1       | 10      |
| Age                                     | 41.125 | 15.741             | 16      | 95      |
| Female                                  | 0.485  | 0.500              | 0       | 1       |
| Country-year-level variables (N = 108)  |        |                    |         |         |
| V-Dem Liberal Democracy index           | 0.550  | 0.256              | 0.061   | 0.890   |
| GDP per capita, 1000 USD                | 16.434 | 13.311             | 1.067   | 71.471  |
| GDP per capita, ln                      | 9.339  | 0.934              | 6.973   | 11.177  |
| Year (year 1994 = 0)                    |        |                    | 0       | 9       |

N individual = 97,962; N surveys = 106; N countries = 72. Data: EVS/3, WVS/3-4.

Table D2. Three-level models predicting democratic values with education and the country's level of democracy.

| Democratic values          | Model 1.0           | Model 1.1               | Model 1.2               | Model 1.3               |
|----------------------------|---------------------|-------------------------|-------------------------|-------------------------|
| Education, years           |                     |                         | 0.083***<br>(0.002)     | 0.049***<br>(0.011)     |
| Democracy                  |                     |                         | 0.519<br>(0.633)        | 0.049<br>(0.735)        |
| Democracy * Education      |                     |                         |                         | 0.066***<br>(0.018)     |
| <u>Control variables</u>   |                     |                         |                         |                         |
| Age                        |                     | 0.019***<br>(0.002)     | 0.018***<br>(0.002)     | 0.015***<br>(0.002)     |
| Age, squared               |                     | -0.0002***<br>(0.00002) | -0.0001***<br>(0.00002) | -0.0001***<br>(0.00002) |
| Female                     |                     | -0.095***<br>(0.013)    | -0.078***<br>(0.013)    | -0.084***<br>(0.012)    |
| Household income           |                     | 0.092***<br>(0.003)     | 0.051***<br>(0.003)     | 0.049***<br>(0.003)     |
| GDP per capita, ln         |                     | 0.543***<br>(0.118)     | 0.445**<br>(0.176)      | 0.313<br>(0.203)        |
| Year                       |                     | -0.018<br>(0.025)       | -0.020<br>(0.025)       | -0.035<br>(0.030)       |
| Constant                   | 2.881***<br>(0.133) | -2.938***<br>(1.119)    | -3.057**<br>(1.413)     | -1.447<br>(1.633)       |
| <u>Variance components</u> |                     |                         |                         |                         |
| Country intercept          | 1.129               | 0.842                   | 0.837                   | 1.078                   |
| Survey intercept           | 0.187               | 0.191                   | 0.188                   | 0.246                   |
| Education slope            |                     |                         |                         | 0.002                   |
| Residual                   | 3.900               | 3.848                   | 3.768                   | 3.733                   |
| <u>Fit statistics</u>      |                     |                         |                         |                         |
| Log Likelihood             | -208,897.0          | -208,256.4              | -207,222.7              | -206,896.7              |
| Akaike Inf. Crit.          | 417,801.9           | 416,532.8               | 414,469.4               | 413,821.3               |
| Bayesian Inf. Crit.        | 417,839.9           | 416,627.7               | 414,583.3               | 413,954.2               |

N individual = 97,962; N surveys = 106; N countries = 72. + p<0.10, \* p<0.05, \*\* p<0.01, \*\*\* p<0.001.

Data: EVS/3, WVS/3-4.

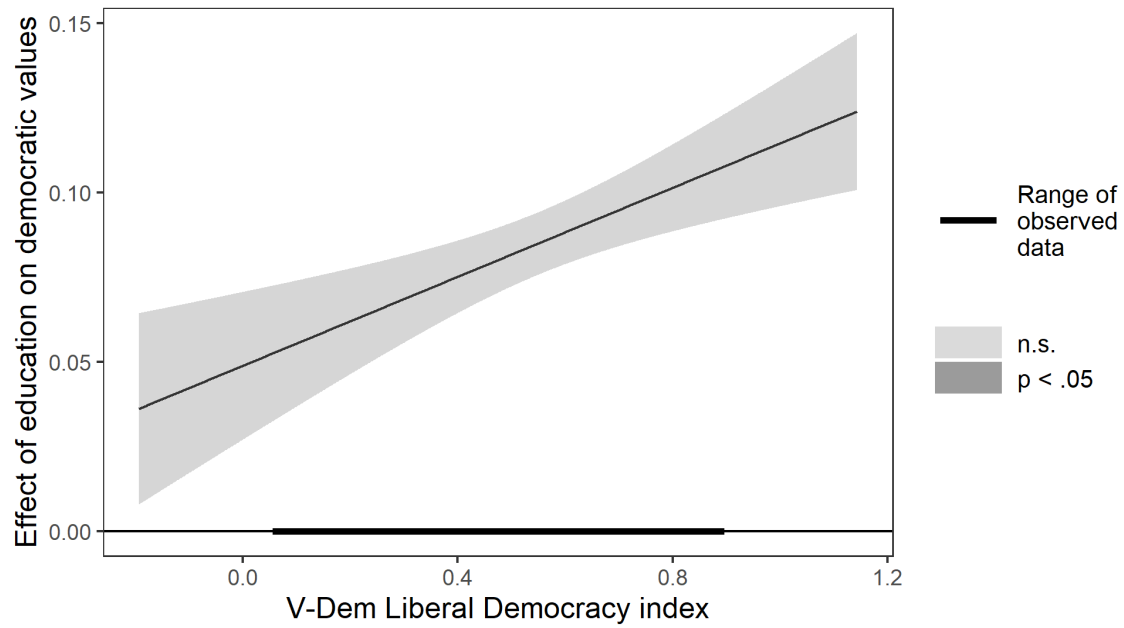

Figure D1. Conditional effects of education on democratic values by level of democracy based on Model 1.3 in Table D2.

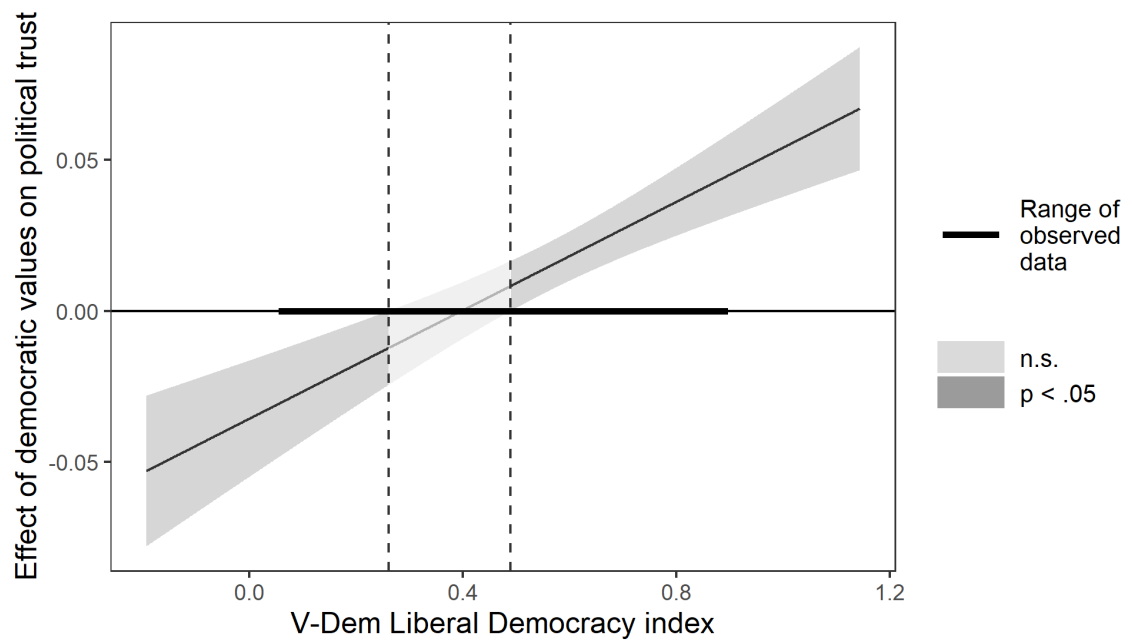

Figure D2. Conditional effects of democratic values on trust in parliament by level of democracy based on Model 2.3 in Table D3.

Table D3. Three-level models predicting trust in parliament with education, democratic values, and the country's level of democracy.

| Political trust               | Model 2.0           | Model 2.1              | Model 2.2              | Model 2.3              | Model 2.4              | Model 2.5              | Model 2.6              |
|-------------------------------|---------------------|------------------------|------------------------|------------------------|------------------------|------------------------|------------------------|
| Democratic values             |                     |                        | 0.012***<br>(0.001)    | -0.036***<br>(0.010)   |                        | -0.029***              | 0.012***<br>(0.001)    |
| Democracy * Democratic values |                     |                        |                        | 0.090***<br>(0.016)    |                        |                        |                        |
| Democracy                     |                     |                        | 0.034<br>(0.248)       | -0.279<br>(0.233)      | 0.038<br>(0.247)       | -0.301<br>(0.264)      | 0.034<br>(0.248)       |
| Education, years              |                     |                        |                        |                        | -0.003***<br>(0.001)   | -0.022***<br>(0.005)   |                        |
| Democracy * Education         |                     |                        |                        |                        |                        | 0.039***<br>(0.008)    |                        |
| <u>Control variables</u>      |                     |                        |                        |                        |                        |                        |                        |
| Age                           |                     | -0.004***<br>(0.001)   | -0.004***<br>(0.001)   | -0.004***<br>(0.001)   | -0.004***<br>(0.001)   | -0.006***<br>(0.001)   | -0.005***<br>(0.001)   |
| Age, squared                  |                     | 0.0001***<br>(0.00001) | 0.0001***<br>(0.00001) | 0.0001***<br>(0.00001) | 0.0001***<br>(0.00001) | 0.0001***<br>(0.00001) | 0.0001***<br>(0.00001) |
| Female                        |                     | -0.0001<br>(0.005)     | 0.001<br>(0.005)       | 0.001<br>(0.005)       | -0.001<br>(0.005)      | -0.003<br>(0.005)      | -0.002<br>(0.005)      |
| Household income              |                     | -0.001<br>(0.001)      | -0.002*<br>(0.001)     | -0.002**<br>(0.001)    | 0.0002<br>(0.001)      | 0.001<br>(0.001)       | 0.0001<br>(0.001)      |
| GDP per capita, ln            |                     | -0.139***<br>(0.045)   | -0.153**<br>(0.069)    | -0.121*<br>(0.064)     | -0.147**<br>(0.068)    | -0.178**<br>(0.073)    | -0.154**<br>(0.070)    |
| Year                          |                     | -0.004<br>(0.010)      | -0.004<br>(0.010)      | 0.008<br>(0.011)       | -0.004<br>(0.010)      | 0.006<br>(0.011)       | 0.014<br>(0.012)       |
| Constant                      | 1.314***<br>(0.046) | 2.658***<br>(0.431)    | 2.738***<br>(0.550)    | 2.533***<br>(0.514)    | 2.736***<br>(0.549)    | 3.154***<br>(0.585)    | 2.955***<br>(0.563)    |
| <u>Variance components</u>    |                     |                        |                        |                        |                        |                        |                        |
| Country intercept             | 0.128               | 0.121                  | 0.121                  | 0.090                  | 0.121                  | 0.138                  | 0.111                  |
| Survey intercept              | 0.034               | 0.032                  | 0.033                  | 0.040                  | 0.032                  | 0.030                  | 0.041                  |
| Education slope               |                     |                        |                        | 0.002                  |                        |                        | 0.001                  |
| Democratic values slope       |                     |                        |                        |                        |                        | 0.000                  | 0.000                  |
| Residual                      | 0.669               | 0.667                  | 0.666                  | 0.658                  | 0.667                  | 0.660                  | 0.653                  |
| <u>Fit statistics</u>         |                     |                        |                        |                        |                        |                        |                        |
| Log Likelihood                | -122,521.8          | -122,412.1             | -122,374.2             | -121,872.4             | -122,412.9             | -122,013.5             | -121,569.9             |
| Akaike Inf. Crit.             | 245,051.5           | 244,844.3              | 244,772.3              | 243,772.8              | 244,849.7              | 244,055.0              | 243,173.7              |
| Bayesian Inf. Crit.           | 245,089.5           | 244,939.2              | 244,886.2              | 243,905.6              | 244,963.6              | 244,187.9              | 243,335.1              |

*N* individual = 99,253; *N* surveys = 108; *N* countries = 74. + *p*<0.10, \* *p*<0.05, \*\* *p*<0.01, \*\*\* *p*<0.001.

Data: EVS/3, WVS/3-4.

Table D4. Mediation analysis for selected levels of democracy.

| Estimate                 | V-Dem Liberal Democracy index |           |          |          |
|--------------------------|-------------------------------|-----------|----------|----------|
|                          | 0.1                           | 0.4       | 0.7      | 0.9      |
| Total effect             | -0.019***                     | -0.008*** | 0.004    | 0.012*** |
| Average direct effect    | -0.017***                     | -0.008*** | 0.002    | 0.008*   |
| Average mediation effect | -0.001***                     | -0.000    | 0.002*** | 0.004*** |
| Proportion mediated      | 0.086***                      | 0.043     | 0.455    | 0.314*** |

+ *p*<0.10, \* *p*<0.05, \*\* *p*<0.01, \*\*\* *p*<0.001. Data: EVS/3, WVS/3-4.

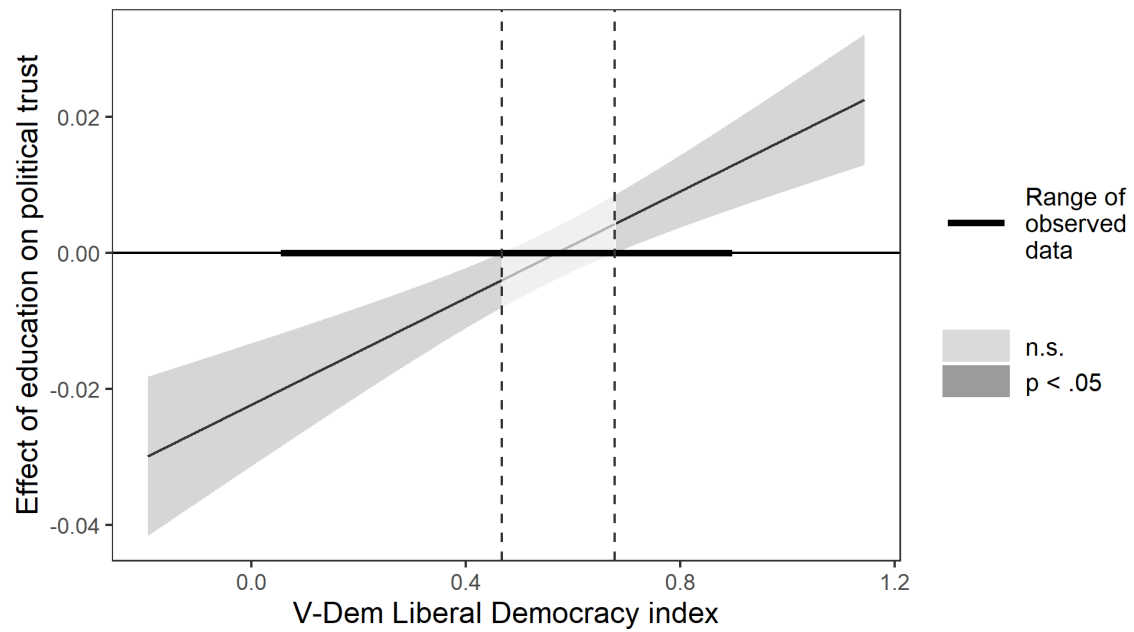

Figure D3. Conditional effects of education on trust in parliament by level of democracy based on Model 2.5 in Table D3.

## Appendix E: Supplemental models: Including the outlying survey from Pakistan

Table E1. Descriptive statistics.

| Variable name                           | Mean   | Standard deviation | Minimum | Maximum |
|-----------------------------------------|--------|--------------------|---------|---------|
| Individual-level variables (N = 99,253) |        |                    |         |         |
| Trust in parliament                     | 1.281  | 0.903              | 0       | 3       |
| Democratic values                       | 2.855  | 2.242              | -6      | 6       |
| Education, years                        | 10.798 | 3.975              | 0       | 20      |
| Household income                        | 4.737  | 2.500              | 1       | 10      |
| Age                                     | 41.050 | 15.714             | 16      | 95      |
| Female                                  | 0.484  | 0.500              | 0       | 1       |
| Country-year-level variables (N = 108)  |        |                    |         |         |
| V-Dem Liberal Democracy index           | 0.543  | 0.259              | 0.061   | 0.890   |
| GDP per capita, 1000 USD                | 16.203 | 13.295             | 1.067   | 71.471  |
| GDP per capita, ln                      | 9.319  | 0.937              | 6.973   | 11.177  |
| Year (year 1994 = 0)                    |        |                    | 0       | 9       |

N individual = 99,253; N surveys = 108; N countries = 74. Data: EVS/3, WVS/3-4.

Table E2. Three-level models predicting democratic values with education and the country's level of democracy.

| Democratic values          | Model 1.0           | Model 1.1               | Model 1.2               | Model 1.3               |
|----------------------------|---------------------|-------------------------|-------------------------|-------------------------|
| Education, years           |                     |                         | 0.081***<br>(0.002)     | 0.044***<br>(0.011)     |
| Democracy                  |                     |                         | 0.269<br>(0.642)        | -0.271<br>(0.748)       |
| Democracy * Education      |                     |                         |                         | 0.072***<br>(0.018)     |
| <u>Control variables</u>   |                     |                         |                         |                         |
| Age                        |                     | 0.019***<br>(0.002)     | 0.018***<br>(0.002)     | 0.015***<br>(0.002)     |
| Age, squared               |                     | -0.0002***<br>(0.00002) | -0.0001***<br>(0.00002) | -0.0001***<br>(0.00002) |
| Female                     |                     | -0.097***<br>(0.013)    | -0.080***<br>(0.012)    | -0.086***<br>(0.012)    |
| Household income           |                     | 0.092***<br>(0.003)     | 0.051***<br>(0.003)     | 0.049***<br>(0.003)     |
| GDP per capita, ln         |                     | 0.505***<br>(0.119)     | 0.457**<br>(0.181)      | 0.323<br>(0.209)        |
| Year                       |                     | -0.014<br>(0.026)       | -0.017<br>(0.025)       | -0.030<br>(0.030)       |
| Constant                   | 2.904***<br>(0.131) | -2.563**<br>(1.121)     | -2.986**<br>(1.450)     | -1.334<br>(1.679)       |
| <u>Variance components</u> |                     |                         |                         |                         |
| Country intercept          | 1.130               | 0.880                   | 0.907                   | 1.173                   |
| Survey intercept           | 0.187               | 0.193                   | 0.184                   | 0.243                   |
| Education slope            |                     |                         |                         | 0.002                   |
| Residual                   | 3.907               | 3.855                   | 3.777                   | 3.741                   |
| <u>Fit statistics</u>      |                     |                         |                         |                         |
| Log Likelihood             | -211,735.1          | -211,094.8              | -210,087.6              | -209,740.2              |
| Akaike Inf. Crit.          | 423,478.2           | 422,209.6               | 420,199.1               | 419,508.3               |
| Bayesian Inf. Crit.        | 423,516.2           | 422,304.6               | 420,313.2               | 419,641.4               |

N individual = 99,253; N surveys = 108; N countries = 74. + p<0.10, \* p<0.05, \*\* p<0.01, \*\*\* p<0.001.

Data: EVS/3, WVS/3-4.



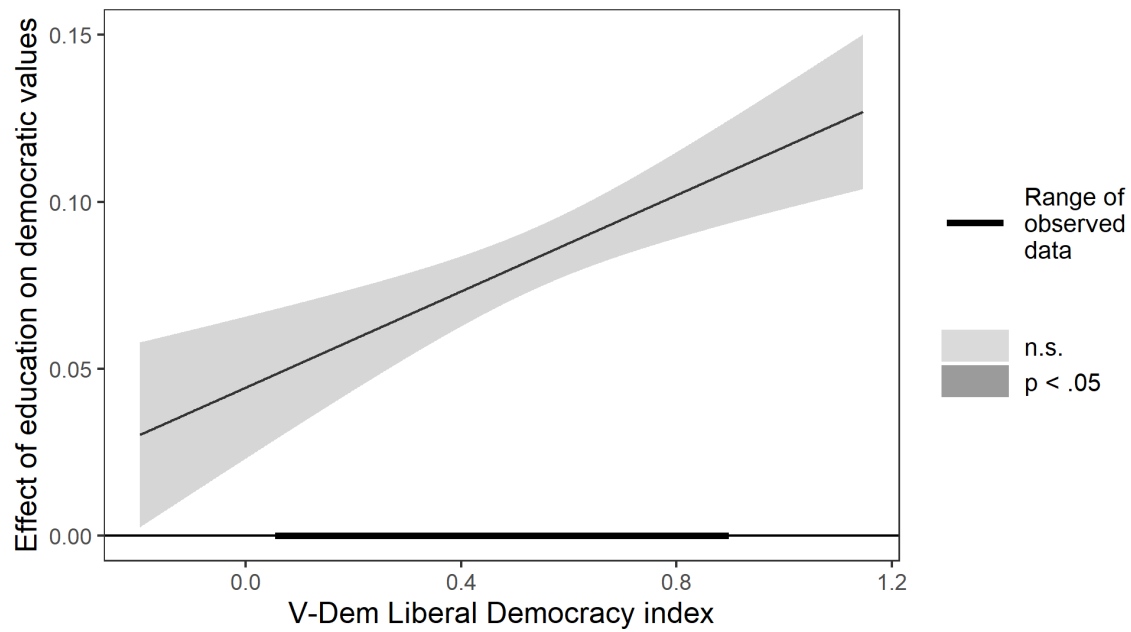

Figure E1. Conditional effects of education on democratic values by level of democracy based on Model 1.3 in Table E2.

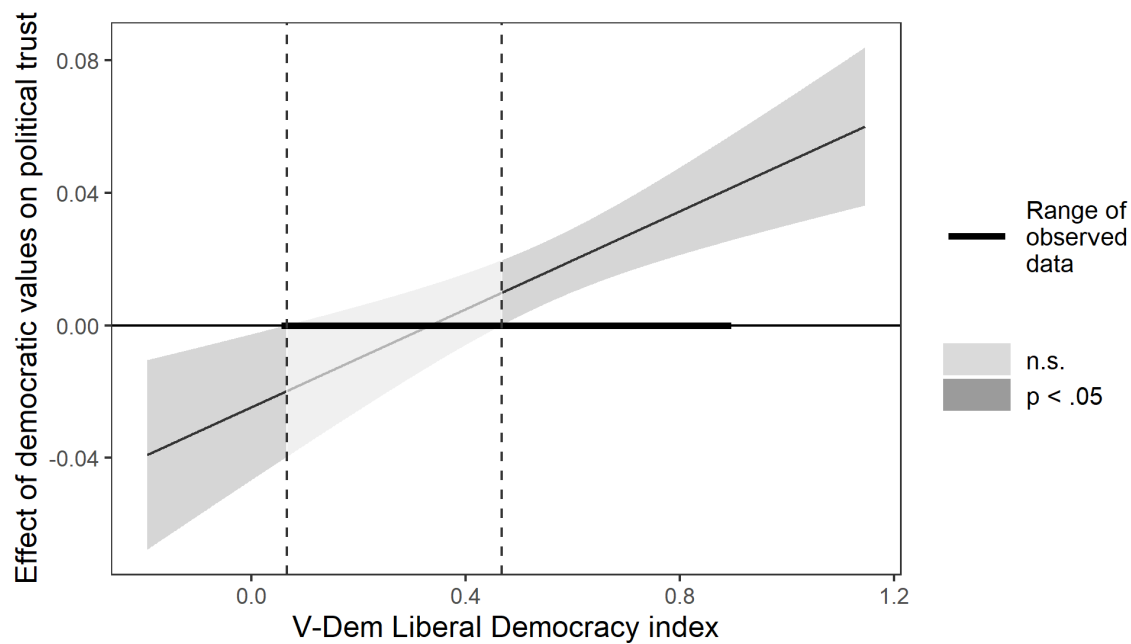

Figure E2. Conditional effects of democratic values on trust in parliament by level of democracy based on Model 2.3 in Table E3.

Table E3. Three-level models predicting trust in parliament with education, democratic values, and the country's level of democracy.

| Political trust               | Model 2.0           | Model 2.1              | Model 2.2              | Model 2.3              | Model 2.4              | Model 2.5              | Model 2.6              |
|-------------------------------|---------------------|------------------------|------------------------|------------------------|------------------------|------------------------|------------------------|
| Democratic values             |                     |                        | 0.015***<br>(0.001)    | -0.025**<br>(0.011)    |                        |                        | -0.019*<br>(0.011)     |
| Democracy * Democratic values |                     |                        |                        | 0.074***<br>(0.019)    |                        |                        | 0.062***<br>(0.018)    |
| Democracy                     |                     |                        | 0.022<br>(0.252)       | -0.043<br>(0.206)      | 0.025<br>(0.252)       | -0.290<br>(0.268)      | -0.415<br>(0.255)      |
| Education, years              |                     |                        |                        |                        | -0.003***<br>(0.001)   | -0.021***<br>(0.004)   | -0.017***<br>(0.004)   |
| Democracy * Education         |                     |                        |                        |                        |                        | 0.037***<br>(0.007)    | 0.029***<br>(0.007)    |
| <u>Control variables</u>      |                     |                        |                        |                        |                        |                        |                        |
| Age                           |                     | -0.004***<br>(0.001)   | -0.004***<br>(0.001)   | -0.004***<br>(0.001)   | -0.004***<br>(0.001)   | -0.005***<br>(0.001)   | -0.005***<br>(0.001)   |
| Age, squared                  |                     | 0.0001***<br>(0.00001) | 0.0001***<br>(0.00001) | 0.0001***<br>(0.00001) | 0.0001***<br>(0.00001) | 0.0001***<br>(0.00001) | 0.0001***<br>(0.00001) |
| Female                        |                     | -0.001<br>(0.005)      | 0.001<br>(0.005)       | 0.001<br>(0.005)       | -0.001<br>(0.005)      | -0.003<br>(0.005)      | -0.002<br>(0.005)      |
| Household income              |                     | -0.001<br>(0.001)      | -0.003**<br>(0.001)    | -0.003**<br>(0.001)    | 0.00004<br>(0.001)     | 0.001<br>(0.001)       | -0.0001<br>(0.001)     |
| GDP per capita, ln            |                     | -0.141***<br>(0.046)   | -0.153**<br>(0.071)    | -0.143**<br>(0.057)    | -0.146**<br>(0.070)    | -0.176**<br>(0.075)    | -0.151**<br>(0.071)    |
| Year                          |                     | -0.005<br>(0.010)      | -0.005<br>(0.010)      | 0.025<br>(0.016)       | -0.005<br>(0.010)      | 0.005<br>(0.011)       | 0.012<br>(0.012)       |
| Constant                      | 1.316***<br>(0.047) | 2.675***<br>(0.437)    | 2.743***<br>(0.566)    | 2.498***<br>(0.463)    | 2.736***<br>(0.565)    | 3.131***<br>(0.599)    | 2.890***<br>(0.567)    |
| <u>Variance components</u>    |                     |                        |                        |                        |                        |                        |                        |
| Country intercept             | 0.139               | 0.131                  | 0.131                  | 0.000                  | 0.131                  | 0.147                  | 0.112                  |
| Survey intercept              | 0.034               | 0.032                  | 0.033                  | 0.122                  | 0.032                  | 0.030                  | 0.042                  |
| Education slope               |                     |                        |                        |                        |                        | 0.000                  | 0.000                  |
| Democratic values slope       |                     |                        |                        | 0.002                  |                        |                        | 0.002                  |
| Residual                      | 0.670               | 0.668                  | 0.667                  | 0.657                  | 0.668                  | 0.661                  | 0.651                  |
| <u>Fit statistics</u>         |                     |                        |                        |                        |                        |                        |                        |
| Log Likelihood                | -124,245            | -124,135               | -124,075               | -123,412               | -124,136               | -123,740               | -123,106               |
| Akaike Inf. Crit.             | 248,497             | 248,290                | 248,173                | 246,852                | 248,296                | 247,509                | 246,245                |
| Bayesian Inf. Crit.           | 248,535             | 248,385                | 248,287                | 246,985                | 248,411                | 247,642                | 246,407                |

*N* individual = 99,253; *N* surveys = 108; *N* countries = 74. +  $p < 0.10$ , \*  $p < 0.05$ , \*\*  $p < 0.01$ , \*\*\*  $p < 0.001$ .

Data: EVS/3, WVS/3-4.

Table E4. Mediation analysis for selected levels of democracy.

| Estimate                 | V-Dem Liberal Democracy index |           |          |          |
|--------------------------|-------------------------------|-----------|----------|----------|
|                          | 0.1                           | 0.4       | 0.7      | 0.9      |
| Total effect             | -0.017***                     | -0.007*** | 0.004+   | 0.011**  |
| Average direct effect    | -0.015***                     | -0.007*** | 0.002    | 0.007*   |
| Average mediation effect | -0.001**                      | -0.000    | 0.002*** | 0.003*** |
| Proportion mediated      | 0.070**                       | 0.022     | 0.433+   | 0.313**  |

+  $p < 0.10$ , \*  $p < 0.05$ , \*\*  $p < 0.01$ , \*\*\*  $p < 0.001$ . Data: EVS/3, WVS/3-4.

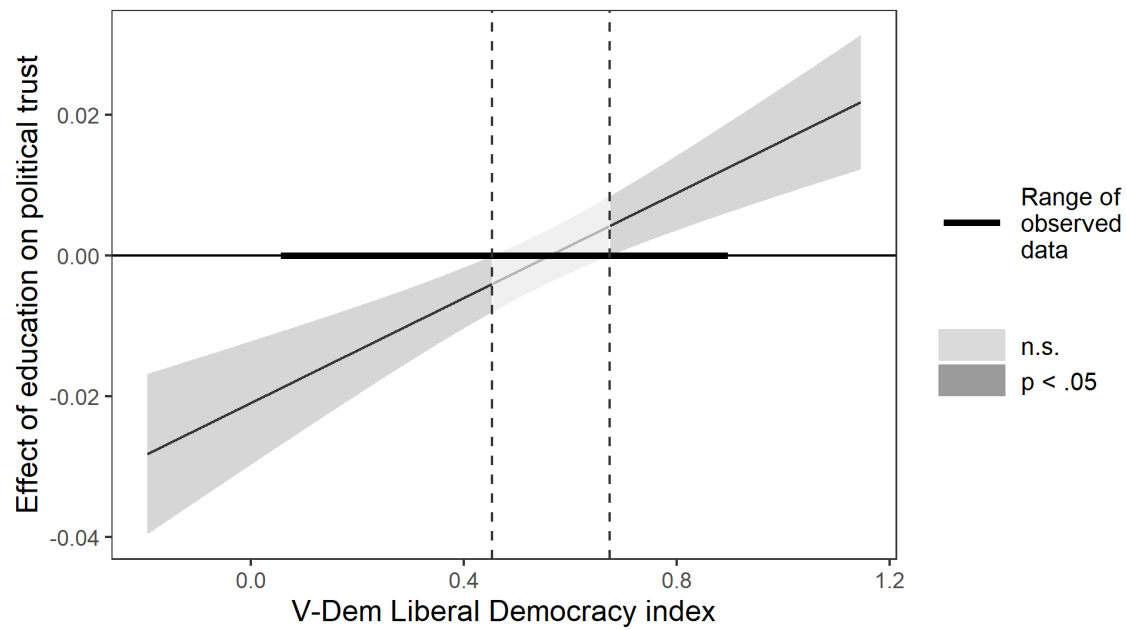

Figure E3. Conditional effects of education on trust in parliament by level of democracy based on Model 2.5 in Table E3.

## Appendix F: Supplemental models: Freedom House ratings as the indicator of democracy

Table F1. Descriptive statistics.

| Variable name                            | Mean   | Standard deviation | Minimum | Maximum |
|------------------------------------------|--------|--------------------|---------|---------|
| Individual-level variables (N = 98,237)  |        |                    |         |         |
| Trust in parliament                      | 1.272  | 0.898              | 0.000   | 3.000   |
| Democratic values                        | 2.853  | 2.243              | -6.000  | 6.000   |
| Education, years                         | 10.803 | 3.973              | 0.000   | 20.000  |
| Household income                         | 4.733  | 2.507              | 1.000   | 10.000  |
| Age                                      | 41.095 | 15.737             | 16.000  | 95.000  |
| Female                                   | 0.485  | 0.500              | 0.000   | 1.000   |
| Country-year-level variables (N = 107)   |        |                    |         |         |
| Freedom House combined ratings, reversed | 8.318  | 3.167              | 1       | 12      |
| GDP per capita, 1000 USD                 | 16.322 | 13.299             | 1.067   | 71.471  |
| GDP per capita, ln                       | 9.330  | 0.934              | 6.973   | 11.177  |
| Year (year 1994 = 0)                     |        |                    | 0       | 9       |

N individual = 98,237; N surveys = 107; N countries = 73. Data: EVS/3, WVS/3-4.

Table F2. Three-level models predicting democratic values with education and the country's level of democracy measured with Freedom House combined ratings.

| Democratic values          | Model 1.0           | Model 1.1               | Model 1.2               | Model 1.3               |
|----------------------------|---------------------|-------------------------|-------------------------|-------------------------|
| Education, years           |                     |                         | 0.082***<br>(0.002)     | 0.044***<br>(0.013)     |
| Democracy                  |                     |                         | 0.053<br>(0.043)        | 0.044<br>(0.050)        |
| Democracy * Education      |                     |                         |                         | 0.005***<br>(0.001)     |
| <u>Control variables</u>   |                     |                         |                         |                         |
| Age                        |                     | 0.019***<br>(0.002)     | 0.018***<br>(0.002)     | 0.014***<br>(0.002)     |
| Age, squared               |                     | -0.0002***<br>(0.00002) | -0.0001***<br>(0.00002) | -0.0001***<br>(0.00002) |
| Female                     |                     | -0.094***<br>(0.013)    | -0.077***<br>(0.012)    | -0.083***<br>(0.012)    |
| Household income           |                     | 0.092***<br>(0.003)     | 0.051***<br>(0.003)     | 0.049***<br>(0.003)     |
| GDP per capita, ln         |                     | 0.518***<br>(0.120)     | 0.385**<br>(0.162)      | 0.177<br>(0.188)        |
| Year                       |                     | -0.015<br>(0.026)       | -0.023<br>(0.026)       | -0.035<br>(0.031)       |
| Constant                   | 2.903***<br>(0.133) | -2.678**<br>(1.136)     | -2.606**<br>(1.322)     | -0.476<br>(1.522)       |
| <u>Variance components</u> |                     |                         |                         |                         |
| Country intercept          | 1.1475              | 0.88749                 | 0.85475                 | 1.0746014               |
| Survey intercept           | 0.18671             | 0.1925                  | 0.19729                 | 0.2640902               |
| Education slope            |                     |                         |                         | 0.0019962               |
| Residual                   | 3.8967              | 3.84489                 | 3.7645                  | 3.730135                |
| <u>Fit statistics</u>      |                     |                         |                         |                         |
| Log Likelihood             | -209,474.000        | -208,835.800            | -207,805.100            | -207,481.200            |
| Akaike Inf. Crit.          | 418,956.100         | 417,691.600             | 415,634.200             | 414,990.500             |
| Bayesian Inf. Crit.        | 418,994.100         | 417,786.600             | 415,748.100             | 415,123.400             |

N individual = 98,237; N surveys = 107; N countries = 73. + p<0.10, \* p<0.05, \*\* p<0.01, \*\*\* p<0.001. Data: EVS/3, WVS/3-4.

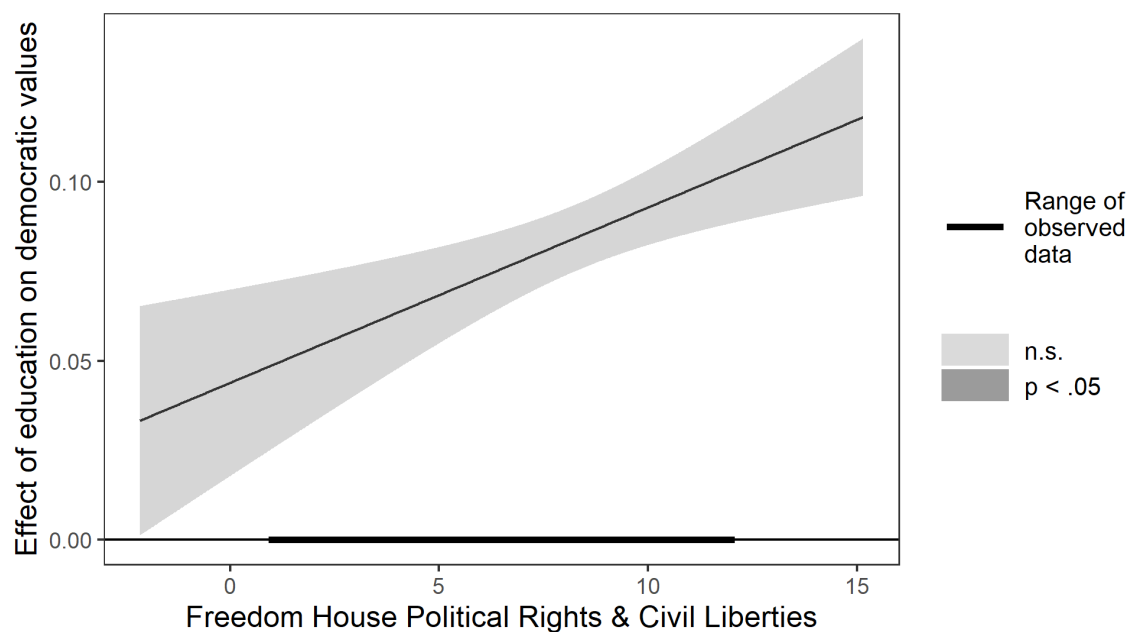

Figure F1. Conditional effects of education on democratic values by level of democracy based on Model 1.3 in Table F2.

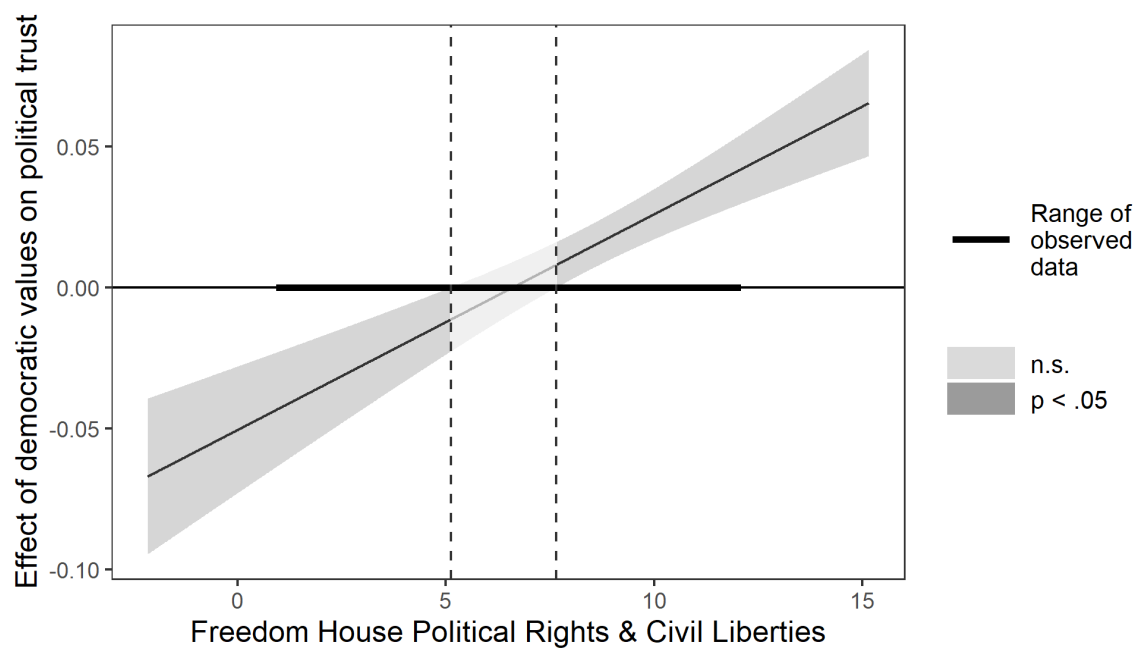

Figure F2. Conditional effects of democratic values on trust in parliament by level of democracy based on Model 2.3 in Table F3.

Table F3. Three-level models predicting trust in parliament with education, democratic values, and the country's level of democracy measured with Freedom House combined ratings.

| Political trust               | Model 2.0           | Model 2.1              | Model 2.3              | Model 2.4              | Model 2.5              | Model 2.6              | Model 2.7              |
|-------------------------------|---------------------|------------------------|------------------------|------------------------|------------------------|------------------------|------------------------|
| Democratic values             |                     |                        | 0.012***<br>(0.001)    | -0.050***<br>(0.011)   |                        |                        | -0.042***<br>(0.011)   |
| Democracy * Democratic values |                     |                        |                        | 0.008***<br>(0.001)    |                        |                        | 0.007***<br>(0.001)    |
| Democracy                     |                     |                        | 0.003<br>(0.017)       | -0.026<br>(0.017)      | 0.004<br>(0.017)       | -0.016<br>(0.018)      | -0.034*<br>(0.018)     |
| Education, years              |                     |                        |                        |                        | -0.003***<br>(0.001)   | -0.025***<br>(0.006)   | -0.020***<br>(0.005)   |
| Democracy * Education         |                     |                        |                        |                        |                        | 0.003***<br>(0.001)    | 0.002***<br>(0.001)    |
| <u>Control variables</u>      |                     |                        |                        |                        |                        |                        |                        |
| Age                           |                     | -0.004***<br>(0.001)   | -0.004***<br>(0.001)   | -0.004***<br>(0.001)   | -0.004***<br>(0.001)   | -0.006***<br>(0.001)   | -0.006***<br>(0.001)   |
| Age, squared                  |                     | 0.0001***<br>(0.00001) | 0.0001***<br>(0.00001) | 0.0001***<br>(0.00001) | 0.0001***<br>(0.00001) | 0.0001***<br>(0.00001) | 0.0001***<br>(0.00001) |
| Female                        |                     | 0.00004<br>(0.005)     | 0.001<br>(0.005)       | 0.001<br>(0.005)       | -0.0005<br>(0.005)     | -0.003<br>(0.005)      | -0.002<br>(0.005)      |
| Household income              |                     | -0.001<br>(0.001)      | -0.002*<br>(0.001)     | -0.002**<br>(0.001)    | 0.0001<br>(0.001)      | 0.001<br>(0.001)       | 0.00002<br>(0.001)     |
| GDP per capita, ln            |                     | -0.130***<br>(0.046)   | -0.143**<br>(0.064)    | -0.104*<br>(0.060)     | -0.140**<br>(0.064)    | -0.187***<br>(0.068)   | -0.155**<br>(0.066)    |
| Year                          |                     | -0.006<br>(0.010)      | -0.006<br>(0.011)      | 0.010<br>(0.012)       | -0.006<br>(0.010)      | 0.006<br>(0.011)       | 0.016<br>(0.012)       |
| Constant                      | 1.305***<br>(0.047) | 2.570***<br>(0.436)    | 2.645***<br>(0.519)    | 2.429***<br>(0.481)    | 2.656***<br>(0.517)    | 3.193***<br>(0.553)    | 2.970***<br>(0.531)    |
| <u>Variance components</u>    |                     |                        |                        |                        |                        |                        |                        |
| Country intercept             | 0.132               | 0.127                  | 0.127                  | 0.089                  | 0.127                  | 0.144                  | 0.112                  |
| Survey intercept              | 0.034               | 0.032                  | 0.033                  | 0.041                  | 0.032                  | 0.032                  | 0.042                  |
| Education slope               |                     |                        |                        |                        |                        | 0.000                  | 0.000                  |
| Democratic values slope       |                     |                        |                        | 0.001                  |                        |                        | 0.001                  |
| Residual                      | 0.669               | 0.667                  | 0.666                  | 0.658                  | 0.667                  | 0.660                  | 0.652                  |
| <u>Fit statistics</u>         |                     |                        |                        |                        |                        |                        |                        |
| Log Likelihood                | -122,878            | -122,769               | -122,734               | -122,231               | -122,773               | -122,378               | -121,935               |
| Akaike Inf. Crit.             | 245,765             | 245,558                | 245,493                | 244,491                | 245,569                | 244,785                | 243,903                |
| Bayesian Inf. Crit.           | 245,803             | 245,653                | 245,607                | 244,623                | 245,683                | 244,918                | 244,065                |

*N* individual = 98,237; *N* surveys = 107; *N* countries = 73. + *p*<0.10, \* *p*<0.05, \*\* *p*<0.01, \*\*\* *p*<0.001.

Data: EVS/3, WVS/3-4.

Table F4. Mediation analysis for selected levels of democracy measured with Freedom House combined ratings.

| Estimate                 | Freedom House combined ratings, reversed <sup>1</sup> |           |         |        |          |          |          |          |
|--------------------------|-------------------------------------------------------|-----------|---------|--------|----------|----------|----------|----------|
|                          | 1                                                     | 5         | 7       | 8      | 9        | 10       | 11       | 12       |
| Total effect             | -0.020***                                             | -0.010*** | -0.005* | -0.003 | 0.000    | 0.003    | 0.005*   | 0.009*   |
| Average direct effect    | -0.018***                                             | -0.009*** | -0.005* | -0.003 | -0.001   | 0.001    | 0.003    | 0.005+   |
| Average mediation effect | -0.002***                                             | -0.001**  | 0.000   | 0.000  | 0.001*** | 0.002*** | 0.003*** | 0.003*** |
| Proportion mediated      | 0.103***                                              | 0.096*    | 0.011   | -0.122 | -0.157   | 0.544    | 0.472*   | 0.396*   |

<sup>1</sup> Range: 0-12; 0 = the least free, 12 = the most free.

+ *p*<0.10, \* *p*<0.05, \*\* *p*<0.01, \*\*\* *p*<0.001. Data: EVS/3, WVS/3-4.

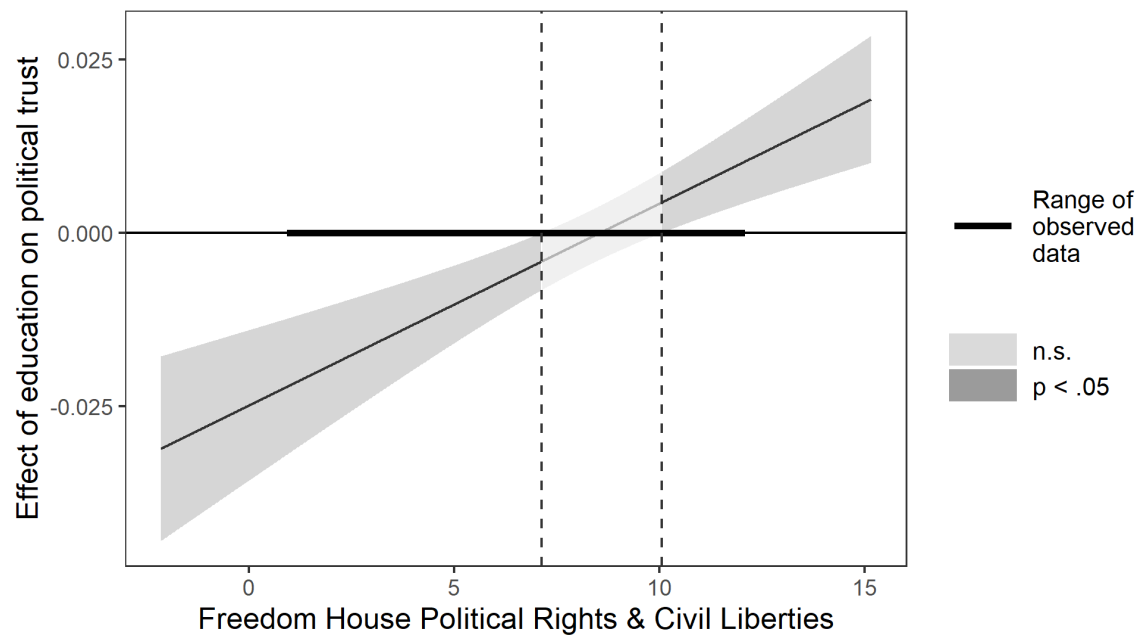

Figure F3. Conditional effects of education on trust in parliament by level of democracy based on Model 2.5 in Table F3.

## Appendix G: Supplemental models: Structural Equation Model

The model was estimated with the `gsem` command in Stata 15.1.

Table G1. Model estimates of multi-level structural equation model.

| Variable name                   | Coef.     | Std. Err. |
|---------------------------------|-----------|-----------|
| <u>Political trust</u>          |           |           |
| Democratic values               | 0.028     | 0.003     |
| Education, years                | -0.024    | 0.003     |
| Democracy                       | -0.036    | 0.005     |
| Democracy * Democratic values   | 0.057     | 0.003     |
| Democracy * Education           | 0.039     | 0.003     |
| Age                             | 0.038     | 0.003     |
| Household income                | -0.016    | 0.003     |
| GDP per capita, ln              | -0.242    | 0.005     |
| Year                            | -0.001    | 0.001     |
| Constant                        | -0.057    | 0.007     |
| <u>Democratic values</u>        |           |           |
| Education, years                | 0.154     | 0.003     |
| Democracy                       | 0.117     | 0.005     |
| Age                             | 0.048     | 0.003     |
| Household income                | 0.053     | 0.003     |
| GDP per capita, ln              | 0.087     | 0.005     |
| Year                            | -0.020    | 0.001     |
| Constant                        | -0.052    | 0.006     |
| <u>Variance components</u>      |           |           |
| M1: Country (political trust)   | 0.071     | 0.001     |
| M2: Country (democratic values) | 0.083     | 0.001     |
| Covariance M1 M2                | 0.002     | 0.001     |
| Residual (political trust)      | 0.843     | 0.004     |
| Residual (democratic values)    | 0.767     | 0.003     |
| <u>Fit statistics</u>           |           |           |
| Log Likelihood                  | -257635.8 |           |
| Akaike Inf. Crit.               | 515315.6  |           |
| Bayesian Inf. Crit.             | 515524.5  |           |
| N cases                         | 98,237    |           |
| N countries                     | 73        |           |

Note: All variables were standardized prior to model estimation.

Table G2. Conditional effects summary.

| Estimate                 | V-Dem Liberal Democracy index* |            |           |           |
|--------------------------|--------------------------------|------------|-----------|-----------|
|                          | 0.1 (-1.8)                     | 0.4 (-0.5) | 0.7 (0.6) | 0.9 (1.3) |
| Total effect             | -0.105***                      | -0.043***  | 0.009**   | 0.042***  |
| Average direct effect    | -0.094***                      | -0.043***  | 0         | 0.026***  |
| Average mediation effect | -0.011***                      | 0          | 0.010***  | 0.016***  |
| Proportion mediated      | 0.109***                       | 0.001      | 1.108     | 0.377***  |

\*V-Dem Liberal Democracy index values (standardized V-Dem Liberal Democracy index values).

N individuals = 98,237; N countries = 73. \* p<0.05, \*\* p<0.01, \*\*\* p<0.001.

Data: EVS/3, WVS/3-4.



## References

- Donnelly MJ and Pop-Eleches G (2018) Income Measures in Cross-National Surveys: Problems and Solutions. *Political Science Research and Methods* 6(2): 355–363. DOI: 10.1017/psrm.2016.40.
- Robitzsch A (2019) sirt: Supplementary Item Response Theory Models. Available at: <https://cran.r-project.org/package=sirt>.
- World Values Survey (2014) *Wave 4 1999-2002 World Values Survey Questionnaire*. Available at: <http://www.worldvaluessurvey.org> (accessed 2 September 2017).
